# Supplementary material for: Integrating omics data and protein interaction networks to prioritize driver genes in cancer
Source: PubMed Central journal article supplement (PMC5601632; doi:10.18632/oncotarget.19481), 2017-07-22
Supplement: oncotarget-08-58050-s001.pdf [file oncotarget-08-58050-s001.pdf]

## **Integrating omics data and protein interaction networks to prioritize driver genes in cancer**

### **SUPPLEMENTARY MATERIALS**

**Supplementary Table 1: Ranked list of candidate driver genes for HNSC, KIRC, and THCA dataset, respectively.**

Rank: rank of the gene according to our method, gene: gene symbol, driver gene score: the score of driver gene calculated by our method.

**See Supplementary File 1**

**Supplementary Table 2: KEGG pathway enrichment analysis for all driver genes identified from THCA, KIRC and HNSC respectively.**

**See Supplementary File 2**
